# Supplementary material
Source: publisher figshare collection journal article supplement (https://acs.figshare.com/ndownloader/files/4274006)
Supplement: Supplementary file 1 [file 4274006]

# Single-Monomer Formulation of Polymerized Polyethylene Glycol Diacrylate as a Nonadsorptive Material for Microfluidics

Chad I. Rogers,<sup>†</sup> Jayson V. Pagaduan,<sup>†</sup> Gregory P. Nordin,<sup>‡</sup> and Adam T. Woolley<sup>\*,†</sup>

<sup>†</sup>Department of Chemistry and Biochemistry and <sup>‡</sup>Department of Electrical and Computer Engineering, Brigham Young University, Provo, UT 84602

## Supporting Information

An overview of the polymerization reaction for PEGDA is given in Figure A. Scanning electron microscopy (SEM) characterization of rectangular channel features and a reservoir in poly-PEGDA is shown in Figure B. Optical transmission of poly-PEGDA is comparable to PDMS over the UV/visible spectral range (Figure C). Poly-PEGDA shows mechanical flexibility when compressed by pinching (Figure D). Formulation optimization parameters and results are shown in Tables S1-S3.

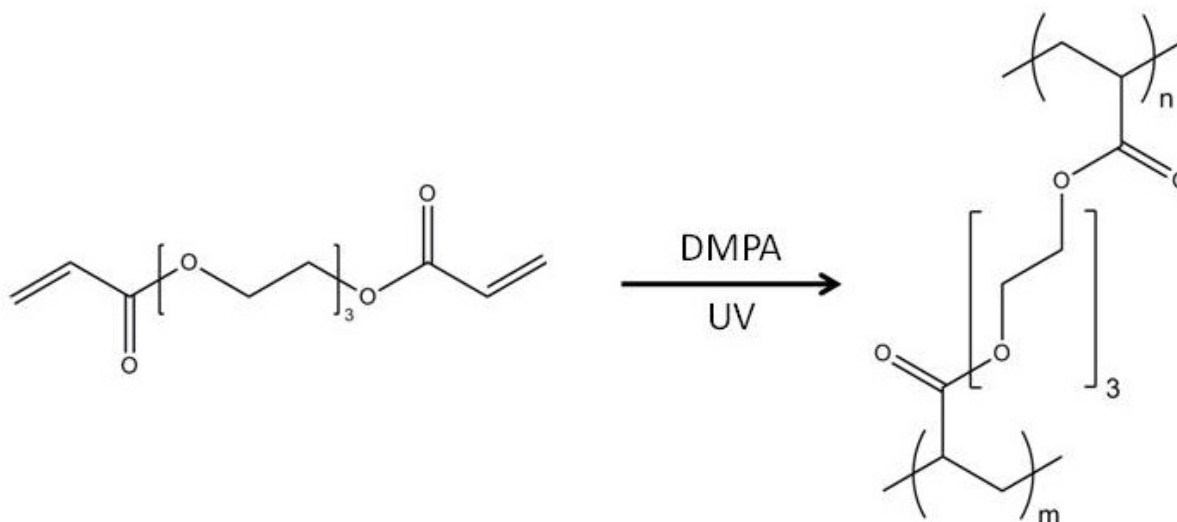

**Figure A: Polymerization of PEGDA to form poly-PEGDA.**

\* To whom correspondence should be addressed. Department of Chemistry and Biochemistry, Brigham Young University, Provo, UT 84602. Email: atw@byu.edu

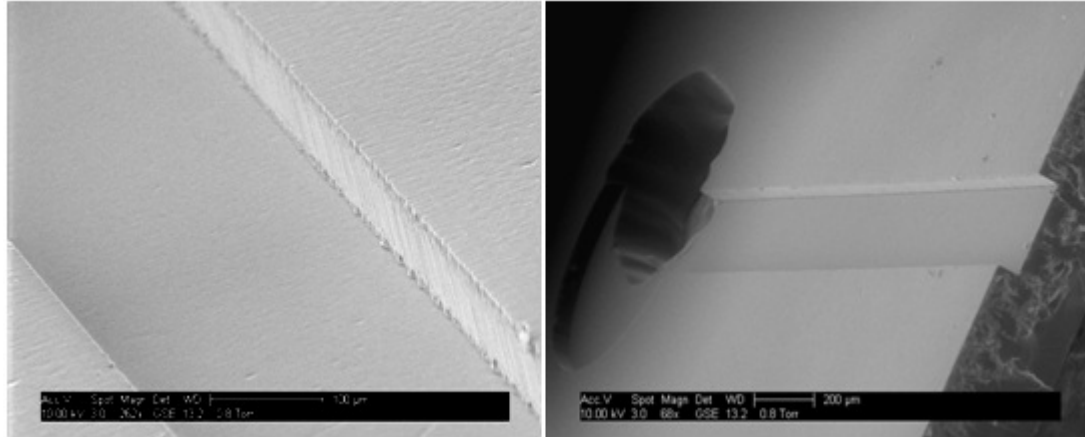

**Figure B: SEM images of poly-PEGDA channels.** (left) Channel surface features in poly-PEGDA created using patterned SU8-2025 as a mold. (right) A straight channel feature intersecting with a fluidic input hole (created using a laser cutter). Channel dimensions are 300 μm wide and 70 μm tall.

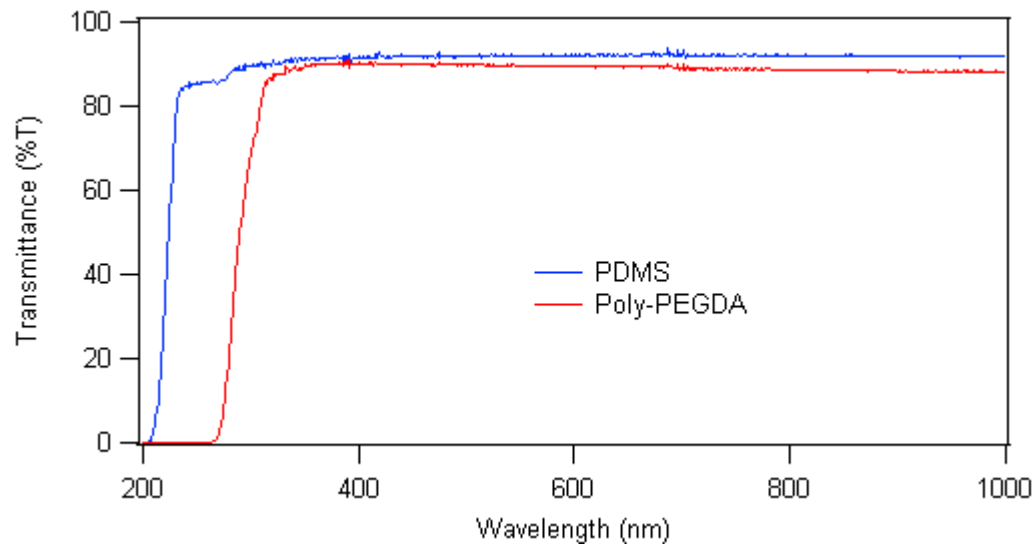

**Figure C: Transmission spectra of 200-μm-thick layers of PDMS and poly-PEGDA.**

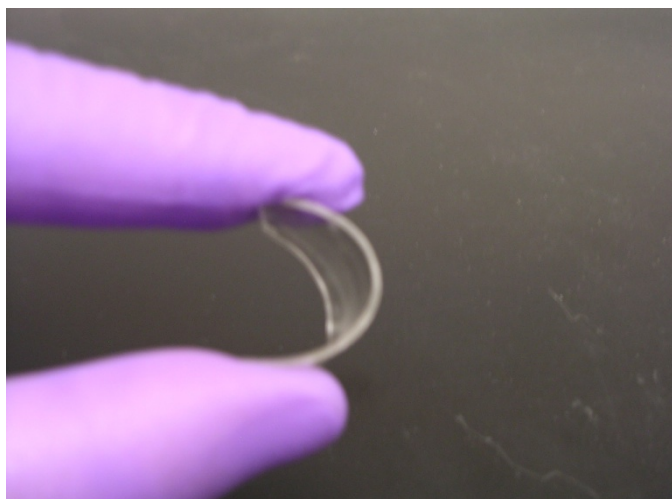

**Figure D: Poly-PEGDA mechanical flexibility.** Flexibility of poly-PEGDA is demonstrated as pressure is applied by pinching a 350  $\mu\text{m}$  thick piece.

**Table S1: Compositions Tested in Poly-PEGDA Optimization.**

| <b>Sample ID</b> | <b>% DMPA</b> | <b>% PEGMEMA</b> | <b>% PEGDA 258</b> | <b>% MMA</b> | <b>Ratio PEGDA/ PEGMEMA</b> |
|------------------|---------------|------------------|--------------------|--------------|-----------------------------|
| <b>A</b>         | 0.05          | 16.3             | 81.6               | 2.0          | <b>5.0</b>                  |
| <b>B</b>         | 0.30          | 16.1             | 81.5               | 2.1          | <b>5.1</b>                  |
| <b>C</b>         | 0.05          | 15.8             | 79.1               | 5.0          | <b>5.0</b>                  |
| <b>D</b>         | 0.30          | 15.8             | 78.8               | 5.0          | <b>5.0</b>                  |
| <b>E</b>         | 0.05          | 8.9              | 88.9               | 2.2          | <b>10.0</b>                 |
| <b>F</b>         | 0.31          | 8.9              | 88.7               | 2.1          | <b>10.0</b>                 |
| <b>G</b>         | 0.05          | 8.7              | 86.2               | 5.1          | <b>9.9</b>                  |
| <b>H</b>         | 0.31          | 8.6              | 86.1               | 5.0          | <b>10.0</b>                 |
| <b>Sample ID</b> | <b>% DMPA</b> | <b>% PEGMEMA</b> | <b>% PEGDA 575</b> | <b>% MMA</b> | <b>Ratio PEGDA/ PEGMEMA</b> |
| <b>I</b>         | 0.06          | 16.2             | 81.2               | 2.5          | <b>5.0</b>                  |
| <b>J</b>         | 0.32          | 16.3             | 81.3               | 2.1          | <b>5.0</b>                  |
| <b>K</b>         | 0.05          | 15.8             | 79.1               | 5.0          | <b>5.0</b>                  |
| <b>L</b>         | 0.31          | 15.6             | 78.9               | 5.2          | <b>5.1</b>                  |
| <b>M</b>         | 0.05          | 8.9              | 89.0               | 2.0          | <b>10.0</b>                 |
| <b>N</b>         | 0.30          | 8.9              | 88.8               | 2.0          | <b>10.0</b>                 |
| <b>O</b>         | 0.05          | 8.6              | 86.3               | 5.0          | <b>10.0</b>                 |
| <b>P</b>         | 0.31          | 8.6              | 86.0               | 5.1          | <b>10.0</b>                 |
| <b>Sample ID</b> | <b>% DMPA</b> | <b>% PEGMEMA</b> | <b>% PEGDA 258</b> | <b>% MMA</b> | <b>Ratio PEGDA/ PEGMEMA</b> |
| <b>Q</b>         | 0.10          | -                | 99.9               | -            | -                           |

**Table S2: Results for Poly-PEGDA Optimization with 10 s Exposure Time.** The

polymerization scale was 0-5, where 0 = all liquid; 1 = some polymerization with about 50/50 liquid/solid; 2 = polymer formed but was soft and could be cut by tweezers using only gravity; 3 = polymer formed and was stiffer than 2, but tweezers cut into it with light pressure; 4 = polymer was stiffer than 3, and more pressure was needed to cut; and 5 = well polymerized, such that tweezers did not cut the material even with significant applied pressure. The clarity scale was 0-2, where 0 = clear, 1 = cloudy, and 2 = white.

| <b>Sample ID</b> | <b>Polymerization</b> | <b>Clarity</b> | <b>Water Immersion Test</b> | <b>Comments</b>                         |
|------------------|-----------------------|----------------|-----------------------------|-----------------------------------------|
| <b>A</b>         | 1                     | 0              | <0.5 min                    | became white                            |
| <b>B</b>         | 5                     | 1              | >10 min                     | survived                                |
| <b>C</b>         | 1                     | 0              | <0.5 min                    | became white                            |
| <b>D</b>         | 5                     | 0              | >10 min                     | survived                                |
| <b>E</b>         | 0                     | 0              | <0.5 min                    | became white                            |
| <b>F</b>         | 5                     | 1              | >10 min                     | survived                                |
| <b>G</b>         | 0                     | 0              | <0.5 min                    | became white                            |
| <b>H</b>         | 5                     | 0              | <0.5 min                    | became white                            |
| <b>I</b>         | 1                     | 0              | >10 min                     | survived but not completely polymerized |
| <b>J</b>         | 4                     | 0              | 1:10 min                    | buckled                                 |
| <b>K</b>         | 1                     | 0              | 4 min                       | buckled                                 |
| <b>L</b>         | 3                     | 0              | <1 min                      | buckled                                 |
| <b>M</b>         | 2                     | 2              | >10 min                     | really soft                             |
| <b>N</b>         | 4                     | 1              | 4:30 min                    | buckled                                 |
| <b>O</b>         | 2                     | 0              | 4 min                       | buckled                                 |
| <b>P</b>         | 4                     | 0              | 1 min                       | buckled                                 |
| <b>Q</b>         | 5                     | 0              | >10 min                     | survived                                |

**Table S3: Results for Poly-PEGDA Optimization with 25 s Exposure Time.** The polymerization and clarity scales were the same as in Table S2.

| <b>Sample ID</b> | <b>Polymerization</b> | <b>Clarity</b> | <b>Water Immersion Test</b> | <b>Comments</b>                                  |
|------------------|-----------------------|----------------|-----------------------------|--------------------------------------------------|
| <b>A</b>         | 5                     | 1              | >10 min                     | survived                                         |
| <b>B</b>         | 5                     | 2              | >10 min                     | survived                                         |
| <b>C</b>         | 3                     | 0              | >10 min                     | survived but really soft when removed from wafer |
| <b>D</b>         | 5                     | 1              | >10 min                     | survived                                         |
| <b>E</b>         | 5                     | 1              | >10 min                     | survived                                         |
| <b>F</b>         | 5                     | 2              | >10 min                     | survived                                         |
| <b>G</b>         | 3                     | 1              | <0.5 min                    | turned white                                     |
| <b>H</b>         | 5                     | 1              | >10 min                     | survived                                         |
| <b>I</b>         | 3                     | 0              | 1:30 min                    | buckled                                          |
| <b>J</b>         | 5                     | 0              | 7 min                       | buckled                                          |
| <b>K</b>         | 3                     | 0              | 6:30 min                    | buckled                                          |
| <b>L</b>         | 4                     | 0              | 2:18 min                    | buckled                                          |
| <b>M</b>         | 5                     | 1              | 4 min                       | buckled                                          |
| <b>N</b>         | 5                     | 0              | >10 min                     | survived                                         |
| <b>O</b>         | 3                     | 0              | 3 min                       | buckled                                          |
| <b>P</b>         | 5                     | 0              | >10 min                     | some separation from silicon but no buckling     |
| <b>Q</b>         | 5                     | 0              | >10 min                     | survived                                         |
